# Supplementary material for: Survival outcome and predictors of WHO grade 2 and 3 insular gliomas: A classification based on the tumor spread
Source: PubMed Central journal article supplement (PMC11161818; doi:10.1002/cam4.7377), 2024-06-08
Supplement: CAM4-13-e7377-s001.pdf [file CAM4-13-e7377-s001.pdf]

# **Survival outcome and predictors of WHO grade 2 and 3 insular gliomas: A classification based on the tumor spread**

Bowen Xue, MD,<sup>1,2</sup> Zonggang Hou, MD,<sup>1,2</sup> Zhenghai Deng, MD,<sup>1,2</sup> Shengjun Sun, MD,<sup>2,3</sup> Chuanhao Zhang, MD,<sup>1,2</sup> Yuesong Pan, MD,<sup>2</sup> Yazhuo Zhang, MD,<sup>2,4</sup> Zhenye Li, MD,<sup>1,2\*</sup> and Jian Xie, MD<sup>1,2\*</sup>

**Journal name:** Cancer Medicine

## **Correspondence:**

Zhenye Li: Beijing Tiantan Hospital, Capital Medical University, China. Email: drlizhenye@163.com

Jian Xie: Beijing Tiantan Hospital, Capital Medical University, China. Email: xiejian0630@126.com

### Supplemental 1. Characteristics of patients according to the complete classification

| Characteristic                   | All        | Classification |            |           |          |           |           | P value          |
|----------------------------------|------------|----------------|------------|-----------|----------|-----------|-----------|------------------|
|                                  |            | 1A             | 1B         | 2A        | 2B       | 3A        | 3B        |                  |
| Number of patients               | 283        | 32(11.3%)      | 111(39.2%) | 49(17.3%) | 11(3.8%) | 57(20.1%) | 23(8.1%)  |                  |
| Age ≥40 years                    | 153(54.1%) | 14(43.8%)      | 51(45.9%)  | 26(53.1%) | 6(54.5%) | 38(66.7%) | 18(78.2%) | <b>0.02</b>      |
| Sex(Male)                        | 154(54.4%) | 18(56.3%)      | 61(55.0%)  | 28(57.1%) | 6(54.5%) | 26(45.6%) | 15(65.2%) | 0.690            |
| Side(Left)                       | 143(50.5%) | 12(37.5%)      | 61(55.0%)  | 21(42.9%) | 4(36.4%) | 31(54.4%) | 14(60.9%) | 0.269            |
| Tumor volume ≥70 cm <sup>3</sup> | 136(48.1%) | 3(9.4%)        | 33(29.7%)  | 27(55.1%) | 7(63.6%) | 44(77.2%) | 22(95.7%) | <b>&lt;0.001</b> |
| Preoperative seizure             | 145(51.2%) | 16(50.0%)      | 53(47.7%)  | 26(53.1%) | 7(63.6%) | 30(52.6%) | 13(59.1%) | 0.901            |
| Tumor grade 3                    | 97(34.3%)  | 4(12.5%)       | 23(20.7%)  | 22(44.9%) | 8(72.7%) | 25(43.9%) | 15(65.2%) | <b>&lt;0.001</b> |
| Molecular subtype                | 169(59.7%) | 22             | 64         | 30        | 7        | 35        | 11        | <b>&lt;0.001</b> |
| 1                                | 59(34.9%)  | 9(40.9%)       | 25(39.1%)  | 13(43.3%) | 0        | 11(31.4%) | 1(9.1%)   |                  |
| 2                                | 71(42.0%)  | 11(50.0%)      | 30(46.9%)  | 15(50.0%) | 2(28.6%) | 12(34.3%) | 1(9.1%)   |                  |
| 3                                | 39(23.1%)  | 2(9.1%)        | 9(14.1%)   | 2(6.7%)   | 5(71.4%) | 12(34.3%) | 9(81.8%)  |                  |
| EOR <90%                         | 84(29.7%)  | 7(21.9%)       | 18(16.2%)  | 11(22.4%) | 8(72.7%) | 26(45.6%) | 14(60.9%) | <b>&lt;0.001</b> |

Molecular subtype (according to 2021 WHO CNS classification): 1 = IDHmut with 1p/19q codeleted; 2 = IDHmut with 1p/19q non-codeleted; 3 = IDH wild type.  
**Boldface type indicates statistical significance.**

**Supplemental 2. Relationship between the clinical features and 2021 WHO molecular subtypes**

|                                   |            | Molecular subtypes                   |                                          |                      | P value           |
|-----------------------------------|------------|--------------------------------------|------------------------------------------|----------------------|-------------------|
|                                   |            | <i>IDH</i> mut with 1p/19q codeleted | <i>IDH</i> mut with 1p/19q non-codeleted | <i>IDH</i> wild type |                   |
| Total                             | 169        | 59                                   | 71                                       | 39                   |                   |
| Age(≥40years)                     | 89(52.7%)  | 35(59.3%)                            | 30(42.3%)                                | 24(61.5%)            | 0.068             |
| Sex(Male)                         | 85(50.3%)  | 25(42.4%)                            | 39(54.9%)                                | 21(53.8%)            | 0.319             |
| Side(Left)                        | 85(50.3%)  | 32(54.2%)                            | 37(52.1%)                                | 16(41.0%)            | 0.406             |
| Tumor volume(≥70cm <sup>3</sup> ) | 76(45.0%)  | 27(45.8%)                            | 27(38.0%)                                | 22(56.4%)            | 0.177             |
| Preoperative seizure              | 79(46.7%)  | 29(49.2%)                            | 28(39.4%)                                | 22(56.4%)            | 0.210             |
| Classification                    |            |                                      |                                          |                      |                   |
| 1                                 | 79(46.7%)  | 30(38.0%)                            | 38(48.1%)                                | 11(13.9%)            | <b>0.029</b>      |
| 2                                 | 45(26.6%)  | 18(40.0%)                            | 20(44.4%)                                | 7(15.6%)             | 0.360             |
| 3                                 | 45(26.6%)  | 11(24.4%)                            | 13(28.9%)                                | 21(46.7%)            | <b>&lt;0.001</b>  |
| Histological grade 3              | 61(36.1%)  | 19(32.2%)                            | 21(29.6%)                                | 21(53.8%)            | <b>0.030</b>      |
| Ki-67 index(≥10%)                 | 72(42.6%)  | 30(50.8%)                            | 22(31.0%)                                | 20(51.3%)            | 0.056             |
| EOR≥90%                           | 120(71.0%) | 45(76.3%)                            | 56(78.9%)                                | 19(48.7%)            | <b>0.002</b>      |
| Median OS(months)                 |            | NA                                   | 73                                       | 34                   | <b>&lt;0.0001</b> |
| Median PFS(months)                |            | NA                                   | 66                                       | 21                   | <b>&lt;0.0001</b> |

Mut= mutation; OS = overall survival; PFS = progression-free survival.

Boldface type indicates statistical significance.

**Supplemental 3. Typical preoperative MRI images of two cases.**

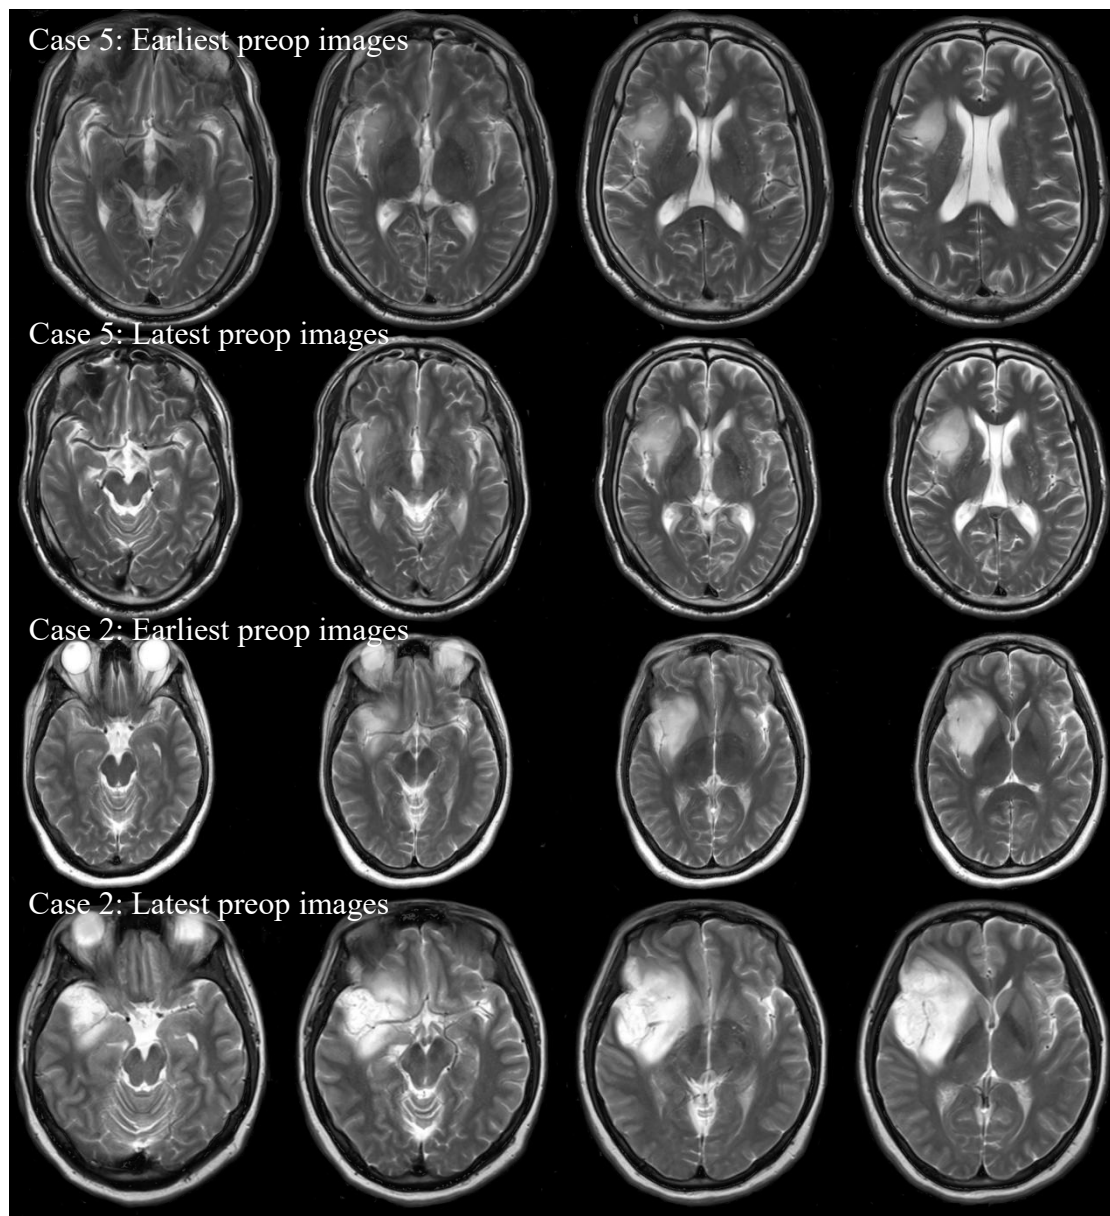

Case 5: tumor spread type 1A; examination intervals 43.3 months; TGR 1.3%/month.  
Case 2: tumor spread type 1B; examination intervals 17.8 months; TGR 0.5%/month.

#### Supplemental 4. The schematic diagram for the tumor spread pathway

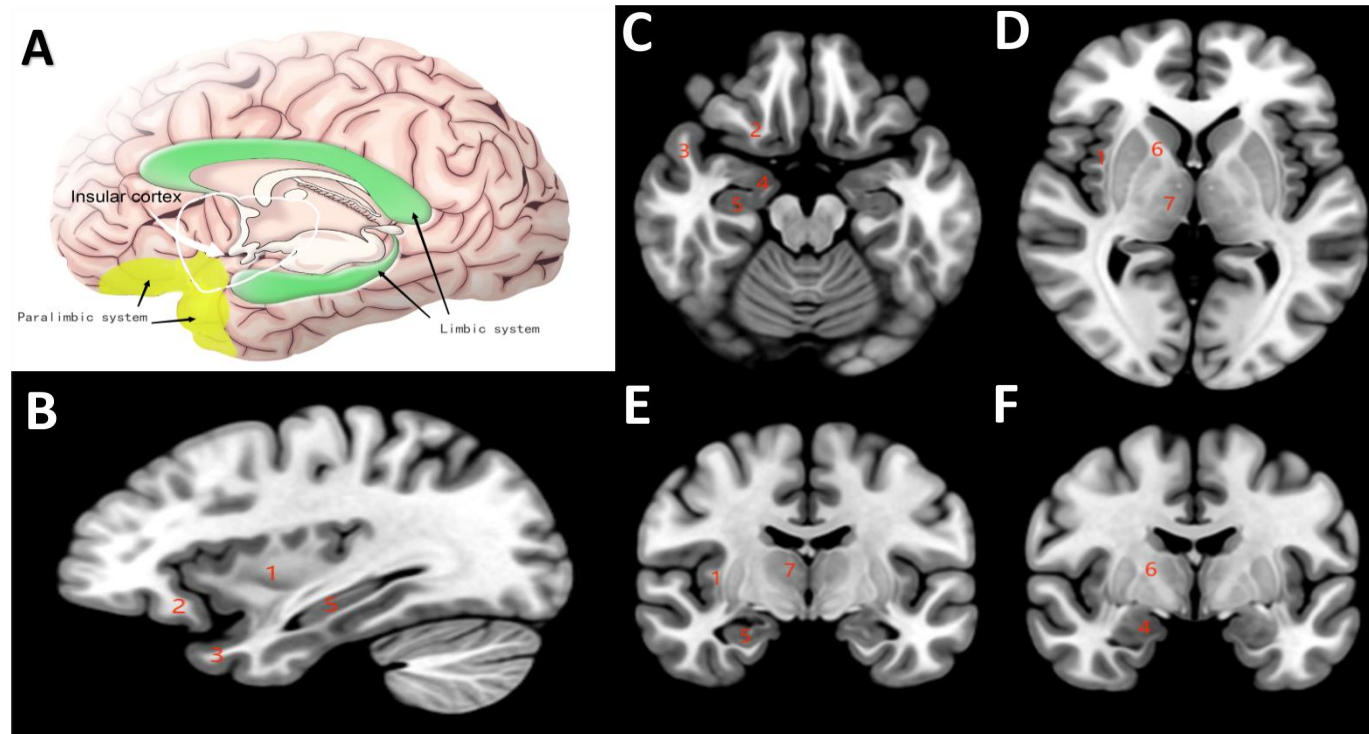

Panel A shows the position schematic diagram of the paralimbic system (including the insular cortex) and limbic system, and the connection between the two systems is the main diffusion pathway of insular gliomas. Panel B-F shows the most commonly invaded structures of insular gliomas in different dimensions, and they were labeled with numbers in the figure. 1-3 belong to the paralimbic system and tumors invading them are defined as type 1; 4-5 belong to the limbic system and tumors invading them are defined as type 2; tumors invading 6 and 7 are defined as type 3. Each type of tumor will be further divided into two groups (A and B), based on their invasion in various systems. The following is the structure names corresponding to the numbers: 1 Insula; 2 Orbitofrontal cortex; 3 Temporal pole; 4 Amygdala and parahippocampal gyrus; 5 Hippocampus; 6 Internal capsule; 7 Thalamus
